1 **Short Title**

2 **Subtilase-mediated parasitism in parasitic plants**

3  
4 **TITLE**

5 **Subtilase activity in the intrusive cells mediates haustorium maturation in parasitic plants**

6  
7 Satoshi Ogawa<sup>a,1</sup>, Takanori Wakatake<sup>a,b,1,3</sup>, Thomas Spallek<sup>a,c</sup>, Juliane K. Ishida<sup>a,b,4</sup>, Ryosuke Sano<sup>d</sup>,  
8 Tetsuya Kurata<sup>d</sup>, Taku Demura<sup>d</sup>, Satoko Yoshida<sup>a,d,e</sup>, Yasunori Ichihashi<sup>a,e,f</sup>, Andreas Schaller<sup>c</sup>, and Ken  
9 Shirasu<sup>a,b,2</sup>

10

11 Affiliation

12

13 <sup>a</sup>RIKEN Center for Sustainable Resource Science, Yokohama, 230-0045, Japan

14 <sup>b</sup>Graduate School of Science, The University of Tokyo, Tokyo, 113-0033, Japan

15 <sup>c</sup>Department of Plant Physiology and Biochemistry, University of Hohenheim, Stuttgart, 70599,  
16 Germany

17 <sup>d</sup>Division of Biological Science, Graduate School of Science and Technology, Nara Institute of Science  
18 and Technology, Ikoma, Nara, 630-0192, Japan

19 <sup>e</sup>PRESTO, Japan Science and Technology Agency, Kawaguchi, Saitama, 332-0012, Japan

20 <sup>f</sup>RIKEN BioResource Research Center, Tsukuba, Ibaraki, 305-0074, Japan

21

22 <sup>1</sup>These authors contributed equally.

23 <sup>2</sup>Author for contact: ken.shirasu@riken.jp

24 <sup>3</sup>Present address: Department of Molecular Plant Physiology and Biophysics, University of Würzburg,  
25 Würzburg, 97082, Germany

26 <sup>4</sup>Present address: Department of Botany, Institute of Biosciences, University of São Paulo, São Paulo,  
27 Brazil.

28

29 **One sentence summary**

30 Tissue-specific analysis showed that the subtilases specifically expressed in intrusive cells regulate  
31 auxin-mediated host-parasite connections in the parasitic plant *Phtheirospermum japonicum*.

32

33 **AUTHOR CONTRIBUTIONS**

34 S.O., T.W., T.S., T.D., S.Y., A.S., and K.S. conceived and designed the study; K.S. supervised the  
35 experiments; S.O., T.W., T.S., J.K.I., R.S., T.K., S.Y., and Y.I. performed the experiments; S.O., T.W.,  
36 T.S., T.D., S.Y., Y.I., A.S., and K.S. analyzed the data; S.O., T.W., T.S., and K.S. drafted the manuscript;  
37 all authors critically revised the manuscript and approved the final version.

38 **ABSTRACT**

39

40 Parasitic plants that infect crops are devastating to agriculture throughout the world. They develop a  
41 unique inducible organ called the haustorium, which connects the vascular systems of the parasite and  
42 host to establish a flow of water and nutrients. Upon contact with the host, the haustorial epidermal  
43 cells at the interface with the host differentiate into specific cells called intrusive cells that grow  
44 endophytically towards the host vasculature. Then, some of the intrusive cells re-differentiate to form  
45 a xylem bridge that connects the vasculatures of the parasite and host. Despite the prominent role of  
46 intrusive cells in host infection, the molecular mechanisms mediating parasitism in the intrusive cells  
47 are unknown. In this study, we investigated differential gene expression in the intrusive cells of the  
48 facultative parasite *Phtheirospermum japonicum* in the family Orobanchaceae by RNA-Sequencing of  
49 laser-microdissected haustoria. We then used promoter analyses to identify genes that are specifically  
50 induced in intrusive cells, and used promoter fusions with genes encoding fluorescent proteins to  
51 develop intrusive cell-specific markers. Four of the intrusive cell-specific genes encode subtilisin-like  
52 serine proteases (SBTs), whose biological functions in parasitic plants are unknown. Expression of an  
53 SBT inhibitor in the intrusive cells inhibited their development, inhibited the development of the xylem  
54 bridge, and reduced auxin response levels near the site where the xylem bridge normally develops.  
55 Therefore, we propose that subtilase activity plays an important role in haustorium development in this  
56 parasitic plant.

57

58 **Keywords:**

59 *Phtheirospermum japonicum*; laser microdissection; intrusive cell; subtilase

60

61

62 There are about 4500 species of parasitic plants; they are widespread, and those that infect  
63 crops are serious threats to agriculture (Yoshida *et al.*, 2016; Clarke *et al.*, 2019). In particular, members  
64 of the family Orobanchaceae, such as *Striga* spp. and *Orobanche* spp., are destructive root parasitic  
65 plants that invade major crops including rice, sorghum, and maize, often in resource-poor societies,  
66 and cause annual economic losses of over 1 billion U.S. dollars (Parker 2009, Runo and Kuria 2018).  
67 Parasitic Orobanchaceae plants produce large numbers of tiny seeds that are widely spread by wind,  
68 water, and people. To germinate, these seeds require host-derived stimulants such as strigolactones,  
69 which are a class of phytohormones (Yoneyama *et al.*, 2010). These seeds can survive for decades in  
70 soil without germination, and thus it is difficult to eliminate parasitic plants from agricultural fields  
71 (Scholes and Press, 2008; Spallek *et al.*, 2013; Gobena *et al.*, 2017).

72

73 Parasitic plants develop a unique inducible organ called the haustorium that is used for  
74 invasion of the host plants. The haustorium connects the vasculature of the parasite with that of the  
75 host to establish a flow of nutrients and water from the host to the parasite (Yoshida *et al.*, 2016;

76 Clarke *et al.*, 2019). Upon recognition of host-derived haustorium-inducing factors (Lynn and Chang,  
77 1990), the parasite initiates organogenesis by activating cell division and cell expansion. In  
78 Orobanchaceae parasites, once the haustorium approaches the host, the epidermal cells in proximity to  
79 the host cells differentiate into intrusive cells, which have highly elongated shapes and function by  
80 intruding into the host (Musselman and Dickison, 1975). Once intrusive cells reach the host vasculature,  
81 some of the intrusive cells differentiate into xylem vessels, and subsequently formation of a xylem  
82 bridge (XB) between the parasite and host vasculature systems is initiated (Musselman and Dickison,  
83 1975; Cui *et al.*, 2016; Wakatake *et al.*, 2018).

84

85 Despite many studies aimed at analyzing the transcriptional changes that occur during  
86 haustorium development and host infection in various species of parasitic plants (Ranjan *et al.*, 2014;  
87 Yang *et al.*, 2015; Zhang *et al.*, 2015; Ichihashi *et al.*, 2015, Sun *et al.*, 2018; Yoshida *et al.*, 2019),  
88 there have been few functional studies of these haustorium-specific genes. To explore the molecular  
89 mechanisms of parasitism, including haustorium organogenesis, we established a model parasitic plant  
90 system using *Phtheirospermum japonicum*, a facultative parasitic plant in the Orobanchaceae (Ishida  
91 *et al.*, 2016; Spallek *et al.*, 2017). *P. japonicum* is a self-fertilizing plant with a diploid genome,  
92 allowing forward genetics studies (Cui *et al.*, 2016). In addition, an efficient root transformation system  
93 by *Agrobacterium rhizogenes*-mediated hairy root formation has been established, making functional  
94 studies of haustorial genes feasible (Ishida *et al.*, 2011). To identify genes important for parasitism, we  
95 previously performed transcriptome analyses using rice-infecting *P. japonicum* and identified genes  
96 strongly expressed during the parasitic stage (Ishida *et al.*, 2016). Among these was the auxin  
97 biosynthetic gene *YUCCA3*, which contributes to auxin biosynthesis in the haustorium. This auxin  
98 undergoes intercellular transportation and leads to the differentiation of tracheary elements, resulting  
99 in the formation of the XB that connects the parasite with the host (Ishida *et al.*, 2016, Wakatake *et al.*,  
100 2018; Wakatake *et al.*, 2020).

101

102 In this study, we identified differentially expressed genes in *P. japonicum* intrusive cells by  
103 using a laser microdissection method (LMD) combined with transcriptome analysis. We then used  
104 temporal and spatial promoter analyses to establish intrusive cell-specific gene markers. Among the  
105 upregulated genes, we focused on four genes encoding subtilisin-like serine proteases (subtilases;  
106 SBTs) that were exclusively expressed in the intrusive cells. We found that expression of an SBT  
107 inhibitor protein in the intrusive cells inhibited the maturation of the haustorium. Thus, our findings  
108 provide molecular insight about how parasitic plants develop their haustoria via SBTs.

109

## 110 **RESULTS**

111

### 112 **Genes specifically expressed in the intrusive cells**

113

114 Intrusive cells only form at the interphase between parasite and a susceptible host and thus  
115 likely participate in the invasion into host tissues and the molecular dialogue between parasite and host  
116 (Goyet *et al.*, 2019). Despite the distinctive nature of intrusive cells, they have not been studied  
117 functionally and in detail yet. To seek molecular markers of their function in *P. japonicum*, we  
118 performed LMD coupled with tissue-specific transcriptome analysis. We used rice (*Oryza sativa* cv.  
119 Koshihikari) as the host plant because *P. japonicum* forms haustoria with relatively more intrusive  
120 cells on rice than on *Arabidopsis* roots (Fig. 1A, B). We separated the intrusive regions from other  
121 parts of the haustoria using LMD with cryosectioned haustoria (Fig. 1C, D), and obtained  
122 transcriptome profiles using the Illumina MiSeq system. After filtering out rice-derived sequences, the  
123 reads were mapped onto the draft genome of *P. japonicum* (Conn *et al.*, 2015) and gene expression  
124 values were obtained. Whole transcriptome data are listed in Supplemental Data Set S1. We detected  
125 a total of 3079 differentially expressed genes between the intrusive cell region and the remainder of  
126 the haustorium (Supplemental Data Set S2). Subsequent Gene Ontology (GO) analysis revealed that  
127 nine GO terms, including “cell wall”, “response to biotic stimulus”, “transporter activity”, and  
128 “metabolic process” were enriched in both regions, whereas 15 GO terms, including “lipid metabolic  
129 process” and “carbohydrate metabolic process” were enriched specifically in other parts of the  
130 haustorium (Supplemental Tables S1 and S2). Only one term, “response to stress” was enriched in  
131 intrusive cells but not in other parts of the haustorium (Supplemental Table S1).

132

133 Next, we aimed to identify marker genes for intrusive cells as tools to investigate this cell type  
134 further. We selected three candidates among the differentially expressed genes that showed strong and  
135 specific expression in the intrusive cells: a homolog of *Haesa-like1* (*HSL1*) that we named *Intrusive*  
136 *Cell-Specific Leucine-rich repeat receptor-like kinase1* (*ICSL1*), *Germin-Like Protein1* (*GLP1*), and  
137 *Constitutive Disease Resistance1* (*CDRI*). These genes encode a leucine-rich repeat receptor-like  
138 kinase (LRR-RLK), a germin-like protein, and an aspartic protease, respectively (Xia *et al.*, 2004; Ham  
139 *et al.*, 2012; Qian *et al.*, 2018). To test whether these genes show specific expression in intrusive cells,  
140 we made constructs containing each gene promoter linked to the sequence encoding a nuclear-localized  
141 fluorescent protein (3xVenus-NLS). We used the constructs to transform *P. japonicum* and analyzed  
142 the Venus fluorescence in *P. japonicum* haustoria formed after infection of *Arabidopsis thaliana* roots.  
143 For all constructs, fluorescence was detected specifically in the intrusive cells at 2 days post-infection  
144 (dpi) (Fig. 2A, C, E), and was stronger at 3 dpi (Fig. 2B, D, F). Intrusive cells are derived from  
145 epidermal cells, but an epidermis marker construct (*pAtPGP4::3xVenus-NLS*) is not expressed in the  
146 intrusive region (Wakatake *et al.*, 2018). To further verify that *ICSL1* expression is specific to intrusive  
147 cells, we used the *ICSL1* promoter to drive a fluorescent marker module that localizes to the plasma  
148 membrane (3xmCherry-SYP; Wakatake *et al.*, 2018). In *P. japonicum* haustoria that were transformed  
149 with both *pAtPGP4::3xVenus-NLS* and *pICSL1::3xmCherry-SYP*, we found mutually exclusive  
150 expression patterns for the two constructs at 4 dpi (Supplemental Fig. S1), with only  
151 *pICSL1::3xmCherry-SYP* expression in the intrusive cells. Based on these analyses, we defined that

152 *ICSL1* as a reliable intrusive cell marker for further analyses.

153  
154 **Phylogeny and expression patterns of subtilases in *P. japonicum***

155         Among the genes that were expressed at higher levels in intrusive cells than in the remainder  
156 of the haustorium, we found five genes encoding subtilisin-like serine proteases (subtilases; SBTs).  
157 This was consistent with our previous report that *SBTs* are highly expressed during the parasitic stage  
158 in *P. japonicum* (Ishida *et al.*, 2016). We therefore hypothesized that SBTs in intrusive cells may  
159 contribute to the host invasion process. To classify the *SBT* genes expressed in intrusive cells, we first  
160 identified all SBTs in the *P. japonicum* genome (Conn *et al.*, 2015) on basis of their Asp-His-Ser  
161 catalytic triad and their peptidase S8 family domain (Smith *et al.*, 1966; Wright *et al.*, 1969). As a  
162 result, 97 putative SBTs met these criteria (Fig. 3). A phylogenetic analysis revealed that the five SBTs  
163 upregulated in intrusive cells all belong to Group 1 (Taylor and Qiu, 2017; Reichardt *et al.*, 2018) (Fig.  
164 3), which contains many SBTs involved in biotic interactions. These genes were thus designated as  
165 *SBT1.1.1*, *SBT1.2.3*, *SBT1.5.2*, *SBT1.7.2*, and *SBT1.7.3*. We also found that the many of the 97 *SBT*  
166 genes in *P. japonicum* were induced in the haustorium at 3 days post-infection (dpi) or later (Fig. 3),  
167 indicating that these *SBTs* were activated after attachment to the host.

168  
169 **Subtilases specifically expressed in intrusive cells**

170  
171         To confirm the expression patterns of the five *SBTs* up-regulated in intrusive cells, we made  
172 constructs containing each gene promoter linked to the 3xVenus-NLS module, transformed *P.*  
173 *japonicum* with the constructs, and analyzed Venus fluorescence in *P. japonicum* haustoria after  
174 infection of *A. thaliana* roots with a confocal microscope. The Venus signal driven by the putative  
175 *SBT1.5.2* promoter was not detected at selected time points. We thus focused on the remaining four  
176 *SBTs* in further analyses. An alignment of their protein products is shown in Supplemental Fig. S2. The  
177 promoters of *SBT1.1.1*, *SBT1.2.3*, and *SBT1.7.3* were sufficient to drive detectable Venus expression  
178 in the intrusive cells at 3 to 7 dpi (Fig. 4A). Expression of *SBT1.7.2* was more transient, with weaker  
179 signal at 7 dpi as compared to 3 and 5 dpi. For the *SBT1.7.3* promoter, signals were detected also in  
180 vascular cells in the meristematic region (Fig. 4A). We used quantitative reverse transcription PCR  
181 (RT-qPCR) to analyze induction of the four *SBTs* in whole haustoria, and found that the levels of  
182 induction at 3 and 7 dpi were consistent with the results from the Venus fluorescence analysis (Fig.  
183 4B). We also analyzed expression of a 3xVenus-NLS construct driven by the *SBT1.7.1* gene, which is  
184 phylogenetically close to *SBT1.7.2* and *SBT1.7.3* (Fig. 3). Florescence from this construct was  
185 observed in the epidermal cells but not the intrusive cells (Supplemental Fig. S3). Since the intrusive  
186 cells are uniquely found in parasitic plants, *SBT1.1.1*, *SBT1.2.3*, *SBT1.7.2*, and *SBT1.7.3* expression in  
187 this cell-type suggest that these *SBTs* function in parasitism.

188  
189 **Subtilases play important roles in development of the host-parasite connection via auxin**

190 **signaling**

191 The four *SBT* genes discussed above may be functionally redundant, and silencing multiple  
192 genes in *P. japonicum* is challenging due to the lack of a transgenerational transformation method.  
193 Therefore, we used an SBT inhibitor protein to analyze the functions of the intrusive cell-specific SBTs.  
194 For this purpose, we chose Extracellular proteinase inhibitor 10 (Epi10) from *Phytophthora infestans*.  
195 Epi10 carries an atypical Kazal domain and inhibits subtilases but does not inhibit the other major  
196 serine proteases, trypsin and chymotrypsin (Tian and Kamoun, 2005; Tian *et al.*, 2005). The tissue-  
197 specific inhibition of SBTs has previously been accomplished by expressing *Epi10* under a tissue-  
198 specific promoter (Schardon *et al.*, 2016). To specifically inhibit the SBTs expressed in developing  
199 haustoria, we used the promoter sequences of *SBT1.1.1* and *SBT1.2.3* to drive expression of the *Epi10*  
200 coding region. We compared the development of haustoria in *P. japonicum* roots transformed with  
201 these constructs with the development of haustoria in control roots transformed with an empty vector.  
202 We found that hairy roots transformed with the *Epi10* constructs showed reduced xylem bridge (XB)  
203 formation in the haustoria at 5 dpi after infection of *Arabidopsis* roots when compared with control  
204 hairy roots (Fig. 5A–C, Supplemental Fig. S4).

205

206 Next, we investigated whether the *Epi10*-transformed hairy roots would show other  
207 developmental abnormalities. We were particularly interested in the effects on intrusive cells, given  
208 the specific expression of *SBT1.1.1* and *SBT1.2.3* in intrusive cells. Therefore, we monitored  
209 expression of the intrusive cell marker *ICSL1* (Fig. 2A, B) in the *Epi10*-expressing haustoria. To  
210 accomplish this, we transformed *P. japonicum* roots with each of the *Epi10* constructs and with a  
211 construct encoding the mCherry fluorescent protein with a nuclear localization signal (3xmCherry-  
212 NLS) driven by the *ICSL1* promoter. In control roots transformed with *pICSL1::3xmCherry-NLS* but  
213 not with *Epi10*, all haustoria showed specific mCherry fluorescence in the intrusive cells. In contrast,  
214 less than 45% of the *pSBT1.1.1::Epi10* haustoria, and approximately 67% of the *pSBT1.2.3::Epi10*  
215 haustoria showed mCherry fluorescence at 5 dpi (Fig. 5D–F). These results suggest that the intrusive  
216 cell-specific SBT activities promote the maturation of haustoria by regulating the development of  
217 intrusive cells and the subsequent XB formation. Lack of intrusive cell identity may affect auxin  
218 distribution (Ishida *et al.*, 2016, Wakatake *et al.*, 2020). Therefore, we investigated whether *Epi10*  
219 expression alters auxin signaling within the haustorium by using the 3xmCherry-NLS module  
220 controlled by the synthetic, auxin-responsive *DR5* promoter (Ulmasov *et al.*, 1995). Most of the auxin  
221 signaling in the central region of the haustoria, but not around the xylem plate, was diminished by  
222 *Epi10* (Fig. 6). Taken together, our results suggest that the SBT activities regulate auxin-dependent  
223 maturation of *P. japonicum* haustoria.

224

225 **DISCUSSION**

226

227 We used *P. japonicum* as a model parasitic plant to elucidate the molecular mechanisms that

228 regulate parasitic functions in the intrusive cells of the haustoria. By using tissue-specific RNA-seq  
229 analysis coupled with LMD, we identified a number of genes that are up-regulated in intrusive cells  
230 (Supplemental Data Set S1). A previous study used the LMD method to reveal genes that are  
231 specifically expressed at the host-parasite interface, which includes the intrusive cells, in the facultative  
232 hemiparasite *Tryphisaria versicolor* infecting *Zea mays* or *Medicago truncatula* (Honaas *et al.*, 2013).  
233 In that study, the GO term “transcription factor activity” was overrepresented, while the term  
234 “transporter activity” was underrepresented at the host-parasite interface. In contrast, we found that  
235 the term “transporter activity” was enriched in the intrusive cells in *P. japonicum* (Supplemental Table  
236 S1). Although a direct comparison of the two experiments is difficult, the results may indicate that *T.*  
237 *versicolor* and *P. japonicum* employ different strategies to invade their particular hosts. Enrichment of  
238 “transporter activity” in intrusive cells also suggests that these cells may have a function in material  
239 transfer, which would be consistent with their position at the interface between host vasculature and  
240 parasite haustorium. We found that several GO terms, such as “lipid metabolic process” and  
241 “carbohydrate metabolic process”, are strongly enriched in the rest of the haustorium but not in the  
242 intrusive cells (Supplemental Tables S1 and S2). Yoshida *et al.* (2019) showed that genes categorized  
243 under the GO terms “protein metabolic process”, “carbohydrate metabolic process”, and “catabolic  
244 process” are upregulated in rice-infecting *Striga hermonthica* at 7 dpi, when the host-parasite  
245 connection in the haustorium is established. This result indicates that metabolically demanding  
246 processes such as morphology are activated in the haustoria in the family Orobanchaceae.

247  
248 Based on our intrusive cell-specific transcriptome, we established that the three *P. japonicum* genes  
249 *ICSL1*, *GLP1*, and *CDRI* showed strong and specific expression in the intrusive cells and could be  
250 used as molecular markers for these cells (Fig. 2). *ICSL1* is homologous to the *Arabidopsis* HSL1  
251 receptor, which localizes to the plasma membrane and recognizes peptide hormones (Torii, 2004;  
252 Macho and Zipfel, 2014; Shinohara *et al.*, 2016). The phylogenetically closest *Arabidopsis* *ICSL1*  
253 homolog, however, is AtRLP52, a receptor-like kinase associated with disease resistance and an  
254 unknown ligand (Ramonell *et al.*, 2005; Ellendorff *et al.*, 2008) (Supplemental Fig. S5). Thus, it is  
255 possible that *ICSL1* also recognizes peptide hormones. Further experiments are required to identify  
256 the unknown *ICSL1* ligand and to determine if it originates from the parasite or the host. The second  
257 marker gene encodes *GLP1*, which belongs to a *GLP* superfamily, which consists of structurally  
258 diverse plant glycoproteins including enzymes such as oxalate oxidases and superoxide dismutases  
259 (Rietz *et al.*, 2012; Sakamoto *et al.*, 2015). Phylogenetic analysis revealed that *GLP1* in *P. japonicum*  
260 is closely related to *Arabidopsis* *GLP1* and *GLP3*, which lack oxalate oxidase activity, and to  
261 GhABP19 in *Gossypium hirsutum*, a superoxide dismutase potentially regulating redox status (Pei *et al.*  
262 *et al.*, 2019) (Supplemental Fig. S6). Interestingly, the only other gene with experimentally confirmed  
263 expression in intrusive cells encodes a peroxidase in *S. hermonthica* (Yoshida *et al.*, 2019). Also,  
264 chemically inhibiting peroxidase activity, and thus altering the redox homeostasis, reduces haustorium  
265 formation in *Striga* spp. and *Triphysaria* (Wada *et al.*, 2019; Wang *et al.*, 2019). The expression of a

266 superoxide dismutase in *P. japonicum* intrusive cells further supports a role for redox regulating  
267 enzymes in haustorium development. The third intrusive cell-specific gene that we identified encodes  
268 CDR1, which belongs to a family of aspartic proteases. The *P. japonicum* CDR1 is a homolog of  
269 aspartic proteases that regulate disease resistance signaling in *Arabidopsis* (Xia *et al.*, 2004)  
270 (Supplemental Fig. S7). It is currently not known if CDR1 regulates defense responses in *P. japonicum*;  
271 however, the expression of defense-related genes in *P. japonicum* haustoria was seen in a previous  
272 microarray study (Ishida *et al.*, 2016).

273

274 *ICSL1*, *GLP1*, and *CDR1* show the same spatio-temporal expression pattern, with detectable  
275 expression beginning at 2 dpi at the interface with the host (Fig. 2A, C, E). This is the time point when  
276 expression of an epidermis marker ceases in the same region (Wakatake *et al.*, 2018). Thus, the  
277 developmental switch from epidermis to intrusive cell is likely to be activated around this time point.  
278 Considering the mutually exclusive expression patterns of the epidermis marker gene and the intrusive  
279 cell marker gene (Supplemental Fig. S1), we would expect that the transcriptional landscapes of these  
280 two cell types are substantially different. Specific expression of *SBT1.7.1* in the epidermal cells, but  
281 not in the intrusive cells support this idea further (Fig. S3). The intrusive cell-specific markers  
282 identified in this study were expressed uniformly in the entire intrusive region (Fig. 2). However, only  
283 a fraction of those cells differentiate into tracheary elements to be part of the XB (Wakatake *et al.*,  
284 2020). Thus it seems that there are different types of cells in the intrusive cell population. This is likely  
285 due to non-uniform auxin response in the intrusive region. Thus further detailed analyses are required  
286 to reveal mechanisms by which auxin responses are controlled in intrusive cells.

287

288 A transcriptome analysis of *P. japonicum* haustoria in our previous study revealed that 7 of  
289 the 10 genes with the highest, exclusive expression in the parasitic stage were *SBTs* (Ishida *et al.*, 2016)  
290 (Supplemental Table S3). Many *SBT* genes are also upregulated in *Striga* spp. upon infection (Yoshida  
291 *et al.*, 2019). *SBTs* are a widespread protein family existing in eubacteria, archaeobacteria, eukaryotes,  
292 and viruses (Rawlings and Barrett, 1994; Schaller *et al.*, 2018). In plants, *SBTs* are required for the  
293 maturation of plant peptide hormones, leading to phenotypic changes such as root elongation,  
294 abscission of floral organs, and embryonic cuticle integrity (Matsubayashi, 2014; Ghorbani *et al.*,  
295 2016; Schardon *et al.*, 2016; Doll *et al.*, 2020; Reichardt *et al.*, 2020). Here, we identified four *SBTs*  
296 that are exclusively expressed in intrusive cells (Figs. 3 and 4), and they all belong to Group 1. Group  
297 1 *SBTs* and Group 5 *SBTs* are highly expanded in parasitic plants compared with those in *Arabidopsis*,  
298 while Groups 3 and 4 are much smaller in *P. japonicum* than in *Arabidopsis* (Fig. 3, Supplemental Fig.  
299 S8). More than 40% of *SBTs* in the parasites *P. japonicum*, *Striga asiatica* and *S. hermonthica* belong  
300 to Group 1 *SBTs*. In addition, Group 1 *SBTs* also expanded in plants that undergo symbiosis with  
301 nitrogen-fixing bacteria. Group 1 *SBTs* also include many that are involved in plant defense (Taylor  
302 and Qiu, 2017; Reichardt *et al.*, 2018). These findings indicate that Group 1 *SBTs* may have evolved  
303 for biotic interactions, including parasitism. The molecular functions and substrates of several Group



304 1 SBTs in non-parasitic plants have been investigated. For example, Phytaspase 2, a Group I SBT in  
305 tomato, cleaves and activates the peptide hormone PHYTOSULFOKINE (PSK), which induces stress-  
306 induced flower drop in tomato, in addition to its well-established growth regulatory and immune-  
307 modulating activities (Reichardt *et al.*, 2020). Genes for PSK and its candidate receptor are present in  
308 the *P. japonicum* genome. Interestingly, expression of these two genes is upregulated in the haustoria  
309 but not in the intrusive cells. If SBT1.1.1 or SBT1.2.3 is involved in PSK precursor processing, the  
310 expression of these two proteins in two different cell types would suggest that they may facilitate the  
311 communication between haustorial tissues. A similar tissue-tissue dialogue mediated by SBTs was  
312 recently shown to operate during *Arabidopsis* seed development (Doll *et al.*, 2020). In contrast,  
313 *Arabidopsis* SBT1.2 (alias SDD1), a homolog of *P. japonicum* SBT1.2.3, contributes to stomatal  
314 development (von Groll *et al.*, 2002). The substrates of SDD1 have not been identified, but were  
315 suggested to also include plant peptide hormones.

316  
317 We showed that SBT activity in intrusive cells contributes to haustorium development (Figs.  
318 4-6, Supplemental Fig. S4). Intrusive cells *per se* were still formed in Epi10-transgenic hairy roots  
319 (Fig. 5B, E; Supplemental Fig. S4). Thus, we can hypothesize that SBTs contribute to differentiation  
320 of intrusive cells into xylem vessels, leading to XB formation. The specific expression of SBTs during  
321 the parasitic stage is shared between *P. japonicum* and *S. hermonthica*, suggesting that SBTs are  
322 important for parasitism in the family Orobanchaceae. Intrusive cell-specific SBTs have not yet been  
323 identified in *S. hermonthica*. However, an *S. hermonthica* SBT is expressed specifically in the  
324 haustorial hyaline body (Yoshida *et al.*, 2019). The hyaline body consists of parenchymatic tissue in  
325 the central region of the haustorium and is characterized by dense, organelle-rich cytoplasm, abundant  
326 paramural deposits, and high metabolic activity (Visser *et al.*, 1984). The hyaline body has not yet been  
327 identified in *P. japonicum* and it may be morphologically distinct from that in *S. hermonthica*. The  
328 further identification of cell-type-specific SBTs in haustoria may facilitate the identification and  
329 functional studies of the hyaline body in *P. japonicum*.

330  
331 Our data suggest that expression of the *SBTs* may be initiated in cells that eventually become  
332 intrusive cells, then the SBT activities contribute to the maturation of the intrusive cells, where the  
333 marker gene *ICSL1* is expressed. After expression of intrusive cell-specific markers, intrusive cells  
334 may invade host tissue, intrusive cells reach the host vasculature, auxin is transported inward towards  
335 the root vasculature, and then the XB is formed (Wakatake *et al.*, 2020). Importantly, treatment with  
336 haustorium-inducing factors induces organogenesis of the haustorium in *P. japonicum* without hosts,  
337 but the intrusive cells and XB are not formed in these haustoria (Ishida *et al.*, 2016, Goyet *et al.*, 2019).  
338 Identification of the unknown host-derived signals required for intrusive-cell specific SBT induction  
339 will provide insights into mechanisms of how Orobanchaceae parasites invade the host plants.

340  
341 We also found that several *SBTs* were induced at the later stages of the infection both in *P.*

342 *japonicum* and in *S. hermonthica* (Supplemental Fig. S8). The late expression of SBTs during the  
343 infection indicates that parasitic plants utilize SBTs also after attachment to the host, possibly in  
344 regulating parasitism. We focused our study on SBTs with a role in haustorium development that can  
345 be studied with transgenic *P. japonicum* hairy roots (Ishida *et al.*, 2016; Wakatake *et al.*, 2020). To  
346 address the role of SBTs in later stages of the infection would require the generation of stable transgenic  
347 plants. In addition, many SBT clades were found to be species-specific, suggesting that each parasite  
348 has recruited SBTs independently to promote parasitism. Since parasitic plants are able to transfer  
349 molecules such as phytohormones and microRNAs (Spallek *et al.*, 2017; Shahid *et al.*, 2018), it is  
350 possible that peptides processed by SBTs in the haustorium can be transported from the parasite into  
351 the host. Further analyses of peptides in infected hosts will be required to assess this hypothesis. In  
352 summary, our study showed that SBTs are required for haustorium development. Functional studies of  
353 other parasite SBTs and their targets will provide important insights into parasitism in future studies.

354

## 355 **MATERIALS AND METHODS**

356

### 357 **Plant materials and growth conditions**

358 *P. japonicum* (Thunb.) Kanitz and rice (*Oryza sativa* L. subspecies *japonica*, cv Koshihikari) seeds  
359 were handled as described previously (Yoshida and Shirasu, 2009; Ishida *et al.*, 2011). For *in vitro*  
360 germination, *P. japonicum* seeds were surface sterilized with 10% commercial bleach solution (Kao,  
361 Tokyo, Japan) for 5 minutes, followed by 5 rinses with sterilized water. Seeds were then sown on solid  
362 half-strength MS medium (0.8% Bacto agar, 1% sucrose, pH 5.8). After stratification at 4°C in the dark  
363 overnight, plants were grown either vertically for infection assays or horizontally for transformation,  
364 at 25°C under long-day conditions (16-h light, 8-h dark). *Arabidopsis* (*Arabidopsis thaliana*, ecotype  
365 Col-0) seeds were surface sterilized with 5% commercial bleach solution for 5 minutes, followed by 5  
366 rinses with sterilized water. Seeds were then sown on solid half-strength MS medium. After  
367 stratification at 4°C in the dark overnight, plants were grown vertically at 22°C under long-day  
368 conditions. Rice seeds were sterilized with 70% ethanol for 3 minutes, followed by incubation in a  
369 50% commercial bleach solution for 20 minutes. After 5 rinses with sterilized water, seeds were sown  
370 on quarter strength Gamborg's B5 medium (Sigma) with 0.7% agar (INA). Plates were kept vertically  
371 at 26°C under long-day conditions.

372

### 373 **Sample preparation for RNA-seq**

374 Ten-day-old *P. japonicum* seedlings were transferred to quarter-strength Gamborg's B5 medium (0.7%  
375 agar; INA) and grown vertically at 25°C under long-day conditions for 2 days. These seedlings and 7-  
376 day-old rice seedlings were transferred together to new quarter strength Gamborg's B5 plates for  
377 infection at 25°C under long-day conditions. At 5 dpi, haustoria were excised and immediately soaked  
378 in chilled RNAlater (Sigma) and stored at 4°C. Samples were embedded in FSC 22 frozen section  
379 media (Leica biosystems) in self-made aluminum molds in an acetone bath at -75°C. Frozen blocks

380 were sectioned to 20  $\mu\text{m}$  thickness using a cryostat (Leica CM3050S) with adhesive seals at  $-30^{\circ}\text{C}$ .  
381 Sections were transferred to room temperature and immediately air-dried. The intrusive regions and  
382 the other parts of the haustorium were dissected using a Leica LMD7000. Dissected tissues were  
383 collected in the lids of 0.5 mL microtubes filled with RNA extraction buffer. Approximately 20  
384 haustoria were used for one biological replicate. Total RNAs were extracted using the Picopure RNA  
385 isolation kit (Arcturus) according to the manufacturer's instructions. DNase I (Qiagen) was applied to  
386 the column during the procedure to digest genomic DNA. Elution buffer (11  $\mu\text{L}$ ) was used to elute the  
387 total RNA. The quality and quantity of the total RNA were assessed using a Bioanalyzer (Agilent  
388 Technologies) and the RNA 6000 pico kit.

389

### 390 **Whole-transcripts amplification and library preparation**

391 The procedure for whole-transcript amplification was based on the Quartz-seq method (Sasagawa *et al.*,  
392 2013). Approximately 1 ng of total RNA was used as a starting material. Total RNA was denatured  
393 ( $70^{\circ}\text{C}$  for 90 sec) and primed ( $35^{\circ}\text{C}$  for 15 sec) followed by first-strand synthesis ( $35^{\circ}\text{C}$  for 5 min;  
394  $45^{\circ}\text{C}$  for 20 min;  $70^{\circ}\text{C}$  for 10 min) with reverse transcriptase and oligo-dT-containing RT primers,  
395 using the SuperScript III system (Life Technologies). Single stranded cDNA was purified using  
396 AMPure XP magnetic beads (Beckman Coulter). The remaining RT primers were digested on the beads  
397 with Exonuclease I (TAKARA) ( $37^{\circ}\text{C}$  for 30 min;  $80^{\circ}\text{C}$  for 20 min). Subsequently, the poly-A-tailing  
398 reaction was performed with terminal transferase (Roche) ( $37^{\circ}\text{C}$  for 50 sec;  $65^{\circ}\text{C}$  for 10 min) followed  
399 by second strand synthesis using a tagging primer with MightyAmp DNA polymerase (TAKARA)  
400 ( $98^{\circ}\text{C}$  for 130 sec;  $40^{\circ}\text{C}$  for 1 min;  $68^{\circ}\text{C}$  for 5 min). PCR enrichment was performed using the  
401 enrichment primers and MightyAmp DNA polymerase ( $98^{\circ}\text{C}$  for 10 sec;  $65^{\circ}\text{C}$  for 15 sec;  $68^{\circ}\text{C}$  for 5  
402 min). The total number of PCR cycles was either 14 or 15, depending on the amount of total RNA  
403 input. The amplified cDNA was purified using DNA concentrator-5 (Zymo Research) according to the  
404 manufacturer's instructions. The size distribution of the amplified cDNA was assessed using the  
405 Bioanalyzer with a High sensitivity DNA kit. The amount of cDNA in each sample was measured  
406 using the Qubit dsDNA HS assay kit (Thermo Fisher). Library preparation was performed using the  
407 Nextera XT kit (Illumina) according to the manufacturer's instructions. The KAPA LA kit (Nippon  
408 Genetics) was used for library amplification after fragmentation. PCR cycles were adjusted to 8 or 9  
409 depending on the amount of input cDNA. Libraries were pooled and sequenced with 3 runs on the  
410 MiSeq using the reagent kit V2 (Illumina).

411

### 412 **Bioinformatics analysis**

413 The adapter sequences in the primers for library preparation and whole transcript amplification were  
414 trimmed and low-quality sequences were removed. Quality-filtered reads were mapped to Nipponbare-  
415 reference-IRGSP-1.0 pseudomolecules (Kawahara *et al.*, 2013) using the CLC genomics workbench  
416 (ver. 8.0, Qiagen) with a threshold setting of 95% match. The remaining unmapped reads were  
417 considered as *P. japonicum*-derived sequences and mapped to the *P. japonicum* draft genome with a

418 threshold setting of 90% match. Unique read counts obtained for each gene model were used for further  
419 analysis. Differential gene expression analysis was performed in R with the TCC package (Sun *et al.*,  
420 2013) (<https://www.R-project.org/>). Gene ontology analysis was performed with GO seq using the  
421 results of the differential gene expression analysis (Young *et al.*, 2010). We used the CLC Main  
422 Workbench (ver. 8.0.1, Qiagen) for identification of the putative SBTs in *P. japonicum*, vector design,  
423 and sequence analyses.

424

### 425 **Phylogenetic analysis**

426 Phylogenetic analyses were performed using the CLC Genomics Workbench (ver. 8.0, Qiagen).  
427 Predicted amino acid sequences were trimmed using trimAL (Capella-Gutiérrez *et al.*, 2009), followed  
428 by alignment. Based on the alignment, the phylogenetic tree was drawn using the maximum-likelihood  
429 method. For comparing the SBTs in *P. japonicum* and Arabidopsis, the reliability of the trees was tested  
430 by bootstrap analysis with 1000 resamplings. For comparing the SBTs in *P. japonicum*, *S. asiatica*, and  
431 *S. hermonthica*, the reliability of the trees was tested by bootstrap analysis with 100 resamplings. The  
432 figure was generated by iTOL (ver. 5) (<https://itol.embl.de/>) (Letunic and Bork, 2007).

433

### 434 **Cloning**

435 Golden Gate cloning technology was used for cloning (Engler *et al.*, 2014). All the *BpiI* and *BsaI*  
436 restriction sites within the cloned DNA sequences were mutated. The golden gate modules *3xVenus-*  
437 *NLS*, *3xmCherry-SYP*, *pACT::3xmCherry-NLS*, and *pAtPGP4::3xVenus-NLS* were described  
438 previously (Ishida *et al.*, 2016; Wakatake *et al.*, 2018).

439

440 *Vectors containing intrusive cell markers:* The *PjICSL1* (2652 bp), *PjGLP1* (2634 bp), and *PjCDRI*  
441 (2496 bp) promoter regions were each PCR-amplified as two fragments from *P. japonicum* genomic  
442 DNA and cloned separately into pAGM1311. The fragments were then combined into the pICH41295  
443 level 0 vector. The promoter sequences were next assembled into level 1 vectors together with the  
444 fluorescent protein module and the 3'UTR and *HSP* terminator module. *pICSL1::3xmCherry-SYP* was  
445 further combined with *pAtPGP4::3xVenus-NLS* in the binary vector pAGM4723 (Engler *et al.*, 2014).

446

447 *Vectors containing the SBT promoters:* The *SBT1.5.2* (2000 bp) and *SBT1.7.3* (1799 bp) promoter  
448 regions were each PCR-amplified as three fragments from *P. japonicum* genomic DNA and cloned  
449 separately into pAGM1311. The fragments were then combined into the pICH41295 level 0 vector.  
450 The *SBT1.1.1* (1691 bp), *SBT1.2.3* (1955 bp), *SBT1.7.2* (1802 bp), and *SBT1.7.1* (1864 bp) promoter  
451 regions were each PCR-amplified as one fragment from *P. japonicum* genomic DNA and cloned into  
452 the pICH41295 level 0 vector. The promoter sequences were then assembled into level 1 vectors  
453 together with the Venus protein module fused with the nuclear localization signal (NLS), and the  
454 3'UTR and terminator module. We also assembled the actin promoter (Wakatake *et al.*, 2018) into a  
455 level 1 vector together with the mCherry protein module fused with the membrane localization signal

456 (Syntaxin of Plant 122, SYP122), and the 3'UTR and *HSP* terminator module, to generate the  
457 *pACT::3xmCherry-SYP122* transcription unit. Each *pSBT::3xVenus-NLS* unit was further combined  
458 with *pACT::3xmCherry-SYP122* in the binary vector pAGM4723.

459

460 *Vectors containing Epi10 sequence:* A codon-optimized Epi10 construct containing the signal peptide-  
461 encoding region of *AtSBT1.7* (At5g67360) (Schardon *et al.*, 2016) was amplified with Golden Gate  
462 compatible primers and cloned into pAGM9121 to generate a level 0 CDS1 module (Engler *et al.*,  
463 2014). The *Epi10* level 0 CDS1 module was then assembled between the *PjSBT* promoter modules and  
464 an *HSP* terminator sequence (Wakatake *et al.*, 2018). The final level-1 constructs were combined with  
465 the fluorescent transformation marker *p35S:3xVenus-NLS* in the binary vector pAGM4723.

466

### 467 **Transformation of *P. japonicum***

468 Transformation of *P. japonicum* was performed as previously described by Ishida *et al.* (2011) with  
469 several modifications. Silwet L-77 (Bio Medical Science) was added to an *A. rhizogenes* bacterial  
470 solution (OD600 = 0.1) to a final concentration of 0.02% (v/v), just prior to transformation. Six-day-  
471 old *P. japonicum* seedlings were immersed in the bacterial/Silwet L-77 solution and submitted to  
472 ultrasonication using a bath sonicator (Ultrasonic Automatic Washer; AS ONE) for 10 to 15 seconds.  
473 The sonicated seedlings were vacuum infiltrated for 5 min. The seedlings were transferred to freshly  
474 made co-cultivation medium (Gamborg B5 agar medium with 1% sucrose and 450  $\mu$ M acetosyringone)  
475 and kept in the dark at 22°C for 2 days. After co-cultivation, the seedlings were transferred to B5 agar  
476 medium containing cefotaxime (300  $\mu$ g/mL). After 3 to 4 weeks, the transformed roots were used for  
477 infection. Identification of the transgenic roots was performed as previously described by Ishida *et al.*  
478 (2016).

479

### 480 **Microscopy**

481 Microscopy with transformed *P. japonicum* was performed as previously described by Spallek *et al.*  
482 (2017) with minor modifications. *P. japonicum* with transgenic hairy roots were transferred to water  
483 agar plates (0.7% agar; INA) for an additional 2 days before infection of 7-day-old *A. thaliana*  
484 seedlings. Infecting plants were then analyzed by confocal microscopy (Leica, TCS SP5 II).

485

### 486 **RT-qPCR**

487 For extraction of total RNA from the haustoria, *P. japonicum* seedlings were grown vertically for 9  
488 days followed by incubation for 2 days on water agar plates before infection of 7-day-old *A. thaliana*  
489 seedlings. At 3 and 7 dpi, haustoria were excised and immediately frozen in liquid nitrogen. We  
490 removed the *A. thaliana* roots as much as possible. Ten to twenty haustoria were used for each sample.  
491 For the 0 dpi samples, we used the root elongation zones from *P. japonicum* seedlings without infection.  
492 Total RNA was extracted using the RNeasy plant mini kit (QIAGEN), followed by cDNA synthesis  
493 using the ReverTra Ace qPCR RT Kit (TOYOBO). During RNA extraction, we treated with DNase to

494 remove residual genomic DNA. RT-qPCR was performed as previously described by Spallek *et al.*  
495 (2017). *PjUBC2* was used as a reference gene. The expression level of each gene was quantified using  
496 the ddCt method.

497

#### 498 **Primers**

499 All primers used for library preparation, cloning, and RT-qPCR are listed in Supplemental Table S4.

500

#### 501 **Statistics**

502 Welch's *t* test was performed in Microsoft Excel 2016.

503

#### 504 **Accession Numbers**

505 Sequence data from this article can be found in the GenBank/EMBL libraries under accession  
506 number BankIt2316603: MT149970-MT150066 (SBTs); BankIt2324477: MT226912 (ICSL1),  
507 MT226913 (GLP1), MT226914 (CDR1).

508 MIAME-compliant (minimum information about a microarray experiment) raw RNA-seq data were  
509 deposited at the DNA Data Bank of Japan (<https://www.ddbj.nig.ac.jp/index-e.html>) under accession  
510 number SAMD00216292-SAMD00216327.

511

## 512 **LITERATURE CITED**

- 513 **Capella-Gutiérrez S, Silla-Martínez JM, Gabaldón T** (2009) trimAl: a tool for automated  
514 alignment trimming in large-scale phylogenetic analyses. *Bioinformatics* **25**: 1972-1973
- 515 **Clarke CR, Timko MP, Yoder JI, Axtell MJ, Westwood JH** (2019) Molecular dialog between  
516 parasitic plants and their hosts. *Annu Rev Phytopathol* **57**: 279-299
- 517 **Conn CE, Bythell-Douglas R, Neumann D, Yoshida S, Whittington B, Westwood JH, Shirasu**  
518 **K, Bond CS, Dyer KA, Nelson DC** (2015) PLANT EVOLUTION. Convergent evolution of  
519 strigolactone perception enabled host detection in parasitic plants. *Science* **349**: 540-543
- 520 **Cui S, Wakatake T, Hashimoto K, Saucet SB, Toyooka K, Yoshida S, Shirasu K** (2016)  
521 Haustorial hairs are specialized root hairs that support parasitism in the facultative parasitic  
522 plant *Phtheirospermum japonicum*. *Plant Physiol* **170**: 1492-1503
- 523 **Doll NM, Royek S, Fujita S, Okuda S, Chamot S, Stintzi A, Widiez T, Hothorn M, Schaller A,**  
524 **Geldner N, Ingram G** (2020) A two-way molecular dialogue between embryo and  
525 endosperm is required for seed development. *Science* **367**: 431-435
- 526 **Ellendorff U, Zhang Z, Thomma BP** (2008) Gene silencing to investigate the roles of receptor-like  
527 proteins in *Arabidopsis*. *Plant Signal Behav* **3**: 893-896
- 528 **Engler C, Youles M, Gruetzner R, Ehnert TM, Werner S, Jones JD, Patron NJ, Marillonnet S**  
529 (2014) A golden gate modular cloning toolbox for plants. *ACS Synth Biol* **3**: 839-843
- 530 **Ghorbani S, Hoogewijs K, Pečenková T, Fernandez A, Inzé A, Eeckhout D, Kawa D, De Jaeger**  
531 **G, Beeckman T, Madder A, Van Breusegem F, Hilson P** (2016) The SBT6.1 subtilase

- 532 processes the GOLVEN1 peptide controlling cell elongation. *J Exp Bot* **67**: 4877-4887
- 533 **Gobena D, Shimels M, Rich PJ, Ruyter-Spira C, Bouwmeester H, Kanuganti S, Mengiste T,**  
534 **Ejeta G** (2017) Mutation in sorghum *LOW GERMINATION STIMULANT 1* alters  
535 strigolactones and causes *Striga* resistance. *Proc Natl Acad Sci U S A* **114**: 4471-4476
- 536 **Goyet V, Wada S, Cui S, Wakatake T, Shirasu K, Montiel G, Simier P, Yoshida S** (2019)  
537 Haustorium inducing factors for parasitic Orobanchaceae. *Front Plant Sci* **10**: 1056
- 538 **Ham BK, Li G, Kang BH, Zeng F, Lucas WJ** (2012) Overexpression of Arabidopsis  
539 plasmodesmata germin-like proteins disrupts root growth and development. *Plant Cell* **24**:  
540 3630-3648
- 541 **Honaas LA, Wafula EK, Yang Z, Der JP, Wickett NJ, Altman NS, Taylor CG, Yoder JI,**  
542 **Timko MP, Westwood JH, dePamphilis CW** (2013) Functional genomics of a generalist  
543 parasitic plant: laser microdissection of host-parasite interface reveals host-specific patterns  
544 of parasite gene expression. *BMC Plant Biol* **13**: 9
- 545 **Ichihashi Y, Mutuku JM, Yoshida S, Shirasu K** (2015) Transcriptomics exposes the uniqueness of  
546 parasitic plants. *Brief Funct Genomics* **14**: 275-282
- 547 **Ishida JK, Wakatake T, Yoshida S, Takebayashi Y, Kasahara H, Wafula E, dePamphilis CW,**  
548 **Namba S, Shirasu K** (2016) Local auxin biosynthesis mediated by a YUCCA flavin  
549 monooxygenase regulates haustorium development in the parasitic plant *Phtheirospermum*  
550 *japonicum*. *Plant Cell* **28**: 1795-1814
- 551 **Ishida JK, Yoshida S, Ito M, Namba S, Shirasu K** (2011) *Agrobacterium rhizogenes*-mediated  
552 transformation of the parasitic plant *Phtheirospermum japonicum*. *PLoS One* **6**: e25802
- 553 **Kawahara Y, de la Bastide M, Hamilton JP, Kanamori H, McCombie WR, Ouyang S,**  
554 **Schwartz DC, Tanaka T, Wu J, Zhou S, Childs KL, Davidson RM, Lin H, Quesada-**  
555 **Ocampo L, Vaillancourt B, Sakai H, Lee SS, Kim J, Numa H, Itoh T, Buell CR,**  
556 **Matsumoto T** (2013) Improvement of the *Oryza sativa* Nipponbare reference genome using  
557 next generation sequence and optical map data. *Rice (N Y)* **6**: 4
- 558 **Letunic I, Bork P** (2007) Interactive Tree Of Life (iTOL): an online tool for phylogenetic tree  
559 display and annotation. *Bioinformatics* **23**: 127-128
- 560 **Lynn DG, Chang M** (1990) Phenolic signals in cohabitation: implications for plant development.  
561 *Annu Rev Plant Physiol Plant Mol Biol* **41**: 497- 526
- 562 **Macho AP, Zipfel C** (2014) Plant PRRs and the activation of innate immune signaling. *Mol Cell* **54**:  
563 263-272
- 564 **Matsubayashi Y** (2014) Posttranslationally modified small-peptide signals in plants. *Annu Rev*  
565 *Plant Biol* **65**: 385-413
- 566 **Musselman L, Dickison W** (1975) The structure and development of the haustorium in parasitic  
567 *Scrophulariaceae*. *Bot J Linn Soc* **70**: 183-212
- 568 **Parker C** (2009) Observations on the current status of *Orobanche* and *Striga* problems worldwide.  
569 *Pest Manag Sci* **65**: 453-459

- 570 **Pei Y, Li X, Zhu Y, Ge X, Sun Y, Liu N, Jia Y, Li F, Hou Y** (2019) GhABP19, a novel germin-  
571 like protein from *Gossypium hirsutum*, plays an important role in the regulation of resistance  
572 to *Verticillium* and *Fusarium* wilt pathogens. *Front Plant Sci* **10**: 583
- 573 **Qian P, Song W, Yokoo T, Minobe A, Wang G, Ishida T, Sawa S, Chai J, Kakimoto T** (2018)  
574 The CLE9/10 secretory peptide regulates stomatal and vascular development through distinct  
575 receptors. *Nat Plants* **4**: 1071-1081
- 576 **Ramonell K, Berrocal-Lobo M, Koh S, Wan J, Edwards H, Stacey G, Somerville S** (2005) Loss-  
577 of-function mutations in chitin responsive genes show increased susceptibility to the powdery  
578 mildew pathogen *Erysiphe cichoracearum*. *Plant Physiol* **138**: 1027-1036
- 579 **Ranjan A, Ichihashi Y, Farhi M, Zumstein K, Townsley B, David-Schwartz R, Sinha NR** (2014)  
580 De novo assembly and characterization of the transcriptome of the parasitic weed dodder  
581 identifies genes associated with plant parasitism. *Plant Physiol* **166**: 1186-1199
- 582 **Rautengarten C, Steinhauser D, Büssis D, Stintzi A, Schaller A, Kopka J, Altmann T** (2005)  
583 Inferring hypotheses on functional relationships of genes: Analysis of the *Arabidopsis*  
584 *thaliana* subtilase gene family. *PLoS Comput Biol* **1**: e40
- 585 **Rawlings ND, Barrett AJ** (1994) Families of serine peptidases. *Methods Enzymol* **244**: 19-61
- 586 **Reichardt S, Piepho HP, Stintzi A, Schaller A** (2020) Peptide signaling for drought-induced  
587 tomato flower drop. *Science* **367**: 1482-1485
- 588 **Reichardt S, Repper D, Tuzhikov AI, Galiullina RA, Planas-Marquès M, Chichkova NV,**  
589 **Vartapetian AB, Stintzi A, Schaller A** (2018) The tomato subtilase family includes several  
590 cell death-related proteinases with caspase specificity. *Sci Rep* **8**: 10531
- 591 **Rietz S, Bernsdorff FE, Cai D** (2012) Members of the germin-like protein family in *Brassica napus*  
592 are candidates for the initiation of an oxidative burst that impedes pathogenesis of *Sclerotinia*  
593 *sclerotiorum*. *J Exp Bot* **63**: 5507-5519
- 594 **Runo S, Kuria EK** (2018) Habits of a highly successful cereal killer, *Striga*. *PLoS Pathog* **14**:  
595 e1006731
- 596 **Sakamoto A, Nishimura T, Miyaki YI, Watanabe S, Takagi H, Izumi S, Shimada H** (2015) In  
597 vitro and in vivo evidence for oxalate oxidase activity of a germin-like protein from azalea.  
598 *Biochem Biophys Res Commun* **458**: 536-542
- 599 **Sasagawa Y, Nikaido I, Hayashi T, Danno H, Uno KD, Imai T, Ueda HR** (2013) Quartz-Seq: a  
600 highly reproducible and sensitive single-cell RNA sequencing method, reveals non-genetic  
601 gene-expression heterogeneity. *Genome Biol* **14**: R31
- 602 **Schaller A, Stintzi A, Graff L** (2012) Subtilases - versatile tools for protein turnover, plant  
603 development, and interactions with the environment. *Physiol Plant* **145**: 52-66
- 604 **Schaller A, Stintzi A, Rivas S, Serrano I, Chichkova NV, Vartapetian AB, Martínez D,**  
605 **Guamét JJ, Sueldo DJ, van der Hoorn RAL, Ramírez V, Vera P** (2018) From structure  
606 to function - a family portrait of plant subtilases. *New Phytol* **218**: 901-915
- 607 **Schardon K, Hohl M, Graff L, Pfannstiel J, Schulze W, Stintzi A, Schaller A** (2016) Precursor



- 608 processing for plant peptide hormone maturation by subtilisin-like serine proteinases. *Science*  
609 **354**: 1594-1597
- 610 **Scholes JD, Press MC** (2008) Striga infestation of cereal crops - an unsolved problem in resource  
611 limited agriculture. *Curr Opin Plant Biol* **11**: 180-186
- 612 **Shahid S, Kim G, Johnson NR, Wafula E, Wang F, Coruh C, Bernal-Galeano V, Phifer T,**  
613 **dePamphilis CW, Westwood JH, Axtell MJ** (2018) MicroRNAs from the parasitic plant  
614 *Cuscuta campestris* target host messenger RNAs. *Nature* **553**: 82-85
- 615 **Shinohara H, Mori A, Yasue N, Sumida K, Matsubayashi Y** (2016) Identification of three LRR-  
616 RKs involved in perception of root meristem growth factor in *Arabidopsis*. *Proc Natl Acad*  
617 *Sci U S A* **113**: 3897-3902
- 618 **Smith EL, Markland FS, Kasper CB, DeLange RJ, Landon M, Evans WH** (1966) The complete  
619 amino acid sequence of two types of subtilisin, BPN' and Carlsberg. *J Biol Chem* **241**: 5974-  
620 5976
- 621 **Spallek T, Melnyk CW, Wakatake T, Zhang J, Sakamoto Y, Kiba T, Yoshida S, Matsunaga S,**  
622 **Sakakibara H, Shirasu K** (2017) Interspecies hormonal control of host root morphology by  
623 parasitic plants. *Proc Natl Acad Sci U S A* **114**: 5283-5288
- 624 **Spallek T, Mutuku M, Shirasu K** (2013) The genus *Striga*: a witch profile. *Mol Plant Pathol* **14**:  
625 861-869
- 626 **Stø IM, Orr RJ, Fooyontphanich K, Jin X, Knutsen JM, Fischer U, Tranbarger TJ, Nordal I,**  
627 **Aalen RB** (2015) Conservation of the abscission signaling peptide IDA during Angiosperm  
628 evolution: withstanding genome duplications and gain and loss of the receptors HAE/HSL2.  
629 *Front Plant Sci* **6**: 931
- 630 **Sun G, Xu Y, Liu H, Sun T, Zhang J, Hettenhausen C, Shen G, Qi J, Qin Y, Li J, Wang L,**  
631 **Chang W, Guo Z, Baldwin IT, Wu J** (2018) Large-scale gene losses underlie the genome  
632 evolution of parasitic plant *Cuscuta australis*. *Nat Commun* **9**: 2683
- 633 **Sun J, Nishiyama T, Shimizu K, Kadota K** (2013) TCC: an R package for comparing tag count  
634 data with robust normalization strategies. *BMC Bioinformatics* **14**: 219
- 635 **Taylor A, Qiu YL** (2017) Evolutionary history of subtilases in land plants and their involvement in  
636 symbiotic interactions. *Mol Plant Microbe Interact* **30**: 489-501
- 637 **Tian M, Benedetti B, Kamoun S** (2005) A second Kazal-like protease inhibitor from *Phytophthora*  
638 *infestans* inhibits and interacts with the apoplastic pathogenesis-related protease P69B of  
639 tomato. *Plant Physiol* **138**: 1785-1793
- 640 **Tian M, Kamoun S** (2005) A two disulfide bridge Kazal domain from *Phytophthora* exhibits stable  
641 inhibitory activity against serine proteases of the subtilisin family. *BMC Biochem* **6**: 15
- 642 **Torii KU** (2004) Leucine-rich repeat receptor kinases in plants: structure, function, and signal  
643 transduction pathways. *Int Rev Cytol* **234**: 1-46
- 644 **Ulmasov T, Murfett J, Hagen G, Guilfoyle TJ** (1997) Aux/IAA proteins repress expression of  
645 reporter genes containing natural and highly active synthetic auxin response elements. *Plant*

- 646 Cell **9**: 1963-1971
- 647 **Visser JH, Inge D, Kollmann R** (1984) The "hyaline body" of the root parasite *Alectra*  
648 *orobanchoides* benth. (*Scrophulariaceae*)—Its anatomy, ultrastructure and histochemistry.  
649 *Protoplasma* **121**: 146-156
- 650 **Von Groll U, Berger D, Altmann T** (2002) The subtilisin-like serine protease SDD1 mediates cell-  
651 to-cell signaling during Arabidopsis stomatal development. *Plant Cell* **14**: 1527-1539
- 652 **Wada S, Cui S, Yoshida S** (2019) Reactive oxygen species (ROS) generation is indispensable for  
653 haustorium formation of the root parasitic plant *Striga hermonthica*. *Front Plant Sci* **10**: 328
- 654 **Wakatake T, Yoshida S, Shirasu K** (2018) Induced cell fate transitions at multiple cell layers  
655 configure haustorium development in parasitic plants. *Development* **145**
- 656 **Wakatake T, Yoshida S, Shirasu K** (2020) Auxin transport network underlies xylem bridge  
657 formation between the hemi-parasitic plant *Phtheirospermum japonicum* and host  
658 Arabidopsis. *BioRxiv*
- 659 **Wang Y, Steele D, Murdock M, Lai S, Yoder J** (2019) Small-molecule screens reveal novel  
660 haustorium inhibitors in the root parasitic plant. *Phytopathology* **109**: 1878-1887
- 661 **Wright CS, Alden RA, Kraut J** (1969) Structure of subtilisin BPN' at 2.5 angström resolution.  
662 *Nature* **221**: 235-242
- 663 **Xia Y, Suzuki H, Borevitz J, Blount J, Guo Z, Patel K, Dixon RA, Lamb C** (2004) An  
664 extracellular aspartic protease functions in Arabidopsis disease resistance signaling. *EMBO J*  
665 **23**: 980-988
- 666 **Xia Y, Suzuki H, Borevitz J, Blount J, Guo Z, Patel K, Dixon RA, Lamb C** (2004) An  
667 extracellular aspartic protease functions in Arabidopsis disease resistance signaling. *EMBO J*  
668 **23**: 980-988
- 669 **Yang Z, Wafula EK, Honaas LA, Zhang H, Das M, Fernandez-Aparicio M, Huang K,**  
670 **Bandaranayake PC, Wu B, Der JP, Clarke CR, Ralph PE, Landherr L, Altman NS,**  
671 **Timko MP, Yoder JJ, Westwood JH, dePamphilis CW** (2015) Comparative transcriptome  
672 analyses reveal core parasitism genes and suggest gene duplication and repurposing as  
673 sources of structural novelty. *Mol Biol Evol* **32**: 767-790
- 674 **Yoneyama K, Awad AA, Xie X, Takeuchi Y** (2010) Strigolactones as germination stimulants for  
675 root parasitic plants. *Plant Cell Physiol* **51**: 1095-1103
- 676 **Yoshida S, Cui S, Ichihashi Y, Shirasu K** (2016) The haustorium, a specialized invasive organ in  
677 parasitic plants. *Annu Rev Plant Biol* **67**: 643-667
- 678 **Yoshida S, Kim S, Wafula EK, Tanskanen J, Kim YM, Honaas L, Yang Z, Spallek T, Conn**  
679 **CE, Ichihashi Y, Cheong K, Cui S, Der JP, Gundlach H, Jiao Y, Hori C, Ishida JK,**  
680 **Kasahara H, Kiba T, Kim MS, Koo N, Laohavisit A, Lee YH, Lumba S, McCourt P,**  
681 **Mortimer JC, Mutuku JM, Nomura T, Sasaki-Sekimoto Y, Seto Y, Wang Y, Wakatake**  
682 **T, Sakakibara H, Demura T, Yamaguchi S, Yoneyama K, Manabe RI, Nelson DC,**  
683 **Schulman AH, Timko MP, dePamphilis CW, Choi D, Shirasu K** (2019) Genome

684 sequence of *Striga asiatica* provides insight into the evolution of plant parasitism. *Curr Biol*  
685 **29**: 3041-3052.e3044

686 **Yoshida S, Shirasu K** (2009) Multiple layers of incompatibility to the parasitic witchweed, *Striga*  
687 *hermonthica*. *New Phytol* **183**: 180-189

688 **Young MD, Wakefield MJ, Smyth GK, Oshlack A** (2010) Gene ontology analysis for RNA-seq:  
689 accounting for selection bias. *Genome Biol* **11**: R14

690 **Zhang X, Berkowitz O, Teixeira da Silva JA, Zhang M, Ma G, Whelan J, Duan J** (2015) RNA-  
691 Seq analysis identifies key genes associated with haustorial development in the root  
692 hemiparasite *Santalum album*. *Front Plant Sci* **6**: 661

693

### 694 **Financial support**

695 This work was supported by Ministry of Education, Culture, Sports, Science and Technology  
696 KAKENHI grants (18H02464 and 18H04838 to S.Y., 15H05959 and 17H06172 to K.S.); Japan  
697 Society for the Promotion of Science (JSPS) Postdoctoral Fellowship (to T.S.); JSPS Research  
698 Fellowship for Young Scientist (to T.W.); JST PRESTO (JPMJPR194D to S.Y.) ; the RIKEN Special  
699 Postdoctoral Researchers Program and the German Research Foundation (DFG, 424122841, to T.S.).

700

### 701 **Figure legends**

702

703 **Figure 1 Laser microdissection of the haustorium in *P. japonicum*.** (A) Safranin-O-stained A  
704 safranin-O-stained haustorium at 3 dpi. Within the haustorium, *P. japonicum* establishes a vascular  
705 connection with the *Arabidopsis* root, called the xylem bridge. The dashed white line outlines the  
706 haustorium. Intrusive cells located at the interface with the host (dashed yellow circle). (B-D)  
707 Sample preparation for tissue-specific transcriptome analysis of a *P. japonicum* haustorium infecting  
708 a rice root. Example of a cryosectioned haustorium before laser microdissection (B), after dissecting  
709 the intrusive region (C), and after dissecting the other part of the haustorium (D). Pj, *P. japonicum*  
710 root; At, *Arabidopsis thaliana* root; XB, xylem bridge; Os, *Oryza sativa* root. Bar = 100  $\mu$ m.

711

712 **Figure 2 Expression dynamics of intrusive cell markers during haustorium development.**

713 Expression patterns of the *ICSL1* (A, B), *GLP1* (C, D), and *CDR1* (E, F) promoters driving a  
714 fluorescent marker gene during haustorium development at the indicated time points in *P. japonicum*.  
715 Bright-field and Venus fluorescent images were merged. Pj, *P. japonicum* root; At, *A. thaliana* root.  
716 Bar = 50  $\mu$ m.

717

718 **Figure 3 Phylogeny of the subtilases (SBTs) in *P. japonicum* and *Arabidopsis*.** The 97 SBTs in *P.*  
719 *japonicum* are shown in red and the 55 SBTs in *Arabidopsis* are shown in black. According to  
720 Rautengarten *et al.* (2005), the SBTs are categorized into 6 groups. The group 6 SBTs represent the  
721 outgroup. The green/red squares indicate the *SBT* gene expression levels at different time points in

722 the haustorium of *P. japonicum*. The blue/orange squares indicate the *SBT* gene expression levels in  
723 the intrusive cells relative to their expression in other haustorial parts. Stars indicate the *SBTs* with  
724 higher expression in the intrusive cells than in the other haustorial parts.

725

726 **Figure 4 Expression dynamics of the SBTs during haustorium development.** (A) Expression  
727 patterns of *SBT* promoters in *P. japonicum* during haustorium development at the indicated time  
728 points. Bright-field and Venus fluorescent images were merged. Pj, *P. japonicum* root; At, *A. thaliana*  
729 root. Bar = 200  $\mu$ m. (B) The relative expression level of each *SBT* at 0, 3, and 7 dpi in isolated  
730 haustoria. “0 dpi” values represent the expression of the marker genes in the root elongation zones of  
731 non-infecting *P. japonicum* roots. Representative data are shown (mean  $\pm$  SE of 4 technical  
732 replicates). We used *PjUBC* as a reference gene. The experiments were performed three times with  
733 similar results. Asterisks indicate statistical significance (\* $P < 0.05$ , \*\* $P < 0.01$ ).

734

735 **Figure 5 Effect of the SBT inhibitor Epi10 on haustorial development.** (A) Representative image  
736 of a control haustorium that formed a xylem bridge (XB) at 5 dpi. (B) Representative image of a  
737 haustorium expressing the SBT inhibitor Epi10 that did not form an XB at 5 dpi. (C) Ratios of  
738 haustoria that formed XBs in *P. japonicum* plants transformed with the empty vector (Control) or  
739 with the *Epi10* gene driven by the *SBT1.1.1* or *SBT1.2.3* promoters (mean  $\pm$  SE of 3 replicates,  $n =$   
740 4–7). (D, E) Representative images of haustoria that did (D) and did not (E) form intrusive cells at 5  
741 dpi. The *ICSL1* promoter was used as an intrusive cell marker. The bright-field and mCherry  
742 fluorescent images are merged. (F) Ratios of haustoria that formed intrusive cells in *P. japonicum*  
743 plants transformed with the empty vector (Control) or with the *Epi10* gene driven by the *SBT1.1.1* or  
744 *SBT1.2.3* promoters (mean  $\pm$  SE of 3 replicates,  $n = 4$ –7). Asterisks indicates statistical significance  
745 (\* $P < 0.1$ , \*\* $P < 0.01$ ). Pj, *P. japonicum*; At, *A. thaliana*; XB, xylem bridge. Bar = 100  $\mu$ m.

746

747 **Figure 6 Effect of the SBT inhibitor on auxin signaling.** (A, B) Representative images of haustoria  
748 in which auxin signaling was observed (A) and not observed (B) around the xylem bridge at 5 dpi.  
749 The *DR5* promoter was used as an auxin signaling marker. The mCherry fluorescence intensity is  
750 depicted in a 5 ramps spectrum. The broken white line indicates the edge of the haustorium. (C)  
751 Ratios of haustoria in which auxin signaling was observed around the xylem bridge in *P. japonicum*  
752 plants transformed with the empty vector (Control) or with the *Epi10* gene driven by the *SBT1.1.1* or  
753 *SBT1.2.3* promoters (mean  $\pm$  SE of 2 replicates,  $n = 2$ –7). Pj, *P. japonicum*; At, *A. thaliana*; XB,  
754 xylem bridge. Bar = 100  $\mu$ m.

755 Figure 1

756

757

758

759

760

761

762

763

764

765

766

767

768

769

770

771

772

773

774

775

776

777

778

779

780

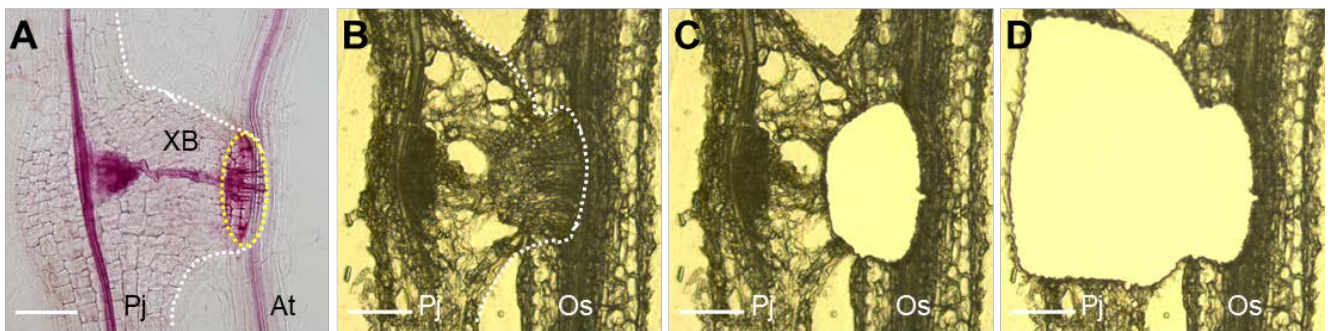

781 Figure 2

782

783

784

785

786

787

788

789

790

791

792

793

794

795

796

797

798

799

**ICSL1::3xVenus-NLS**

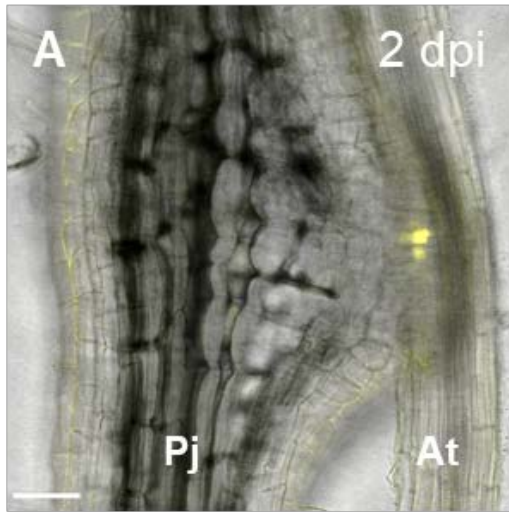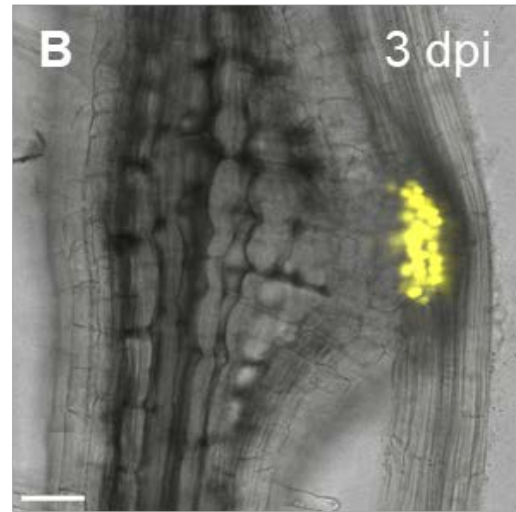

**GLP1::3xVenus-NLS**

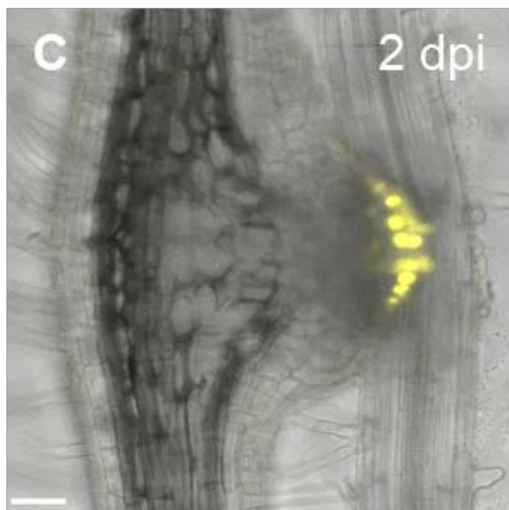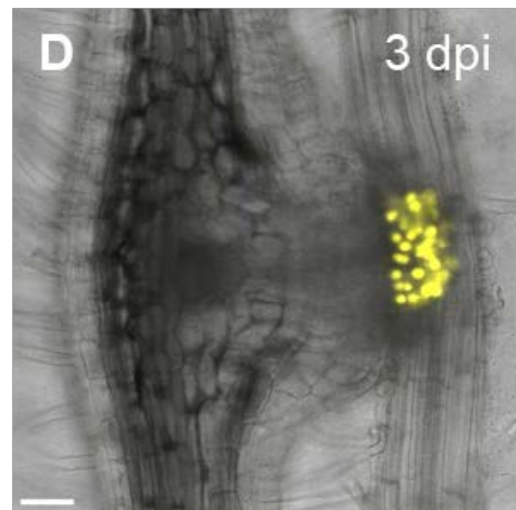

**CDR1::3xVenus-NLS**

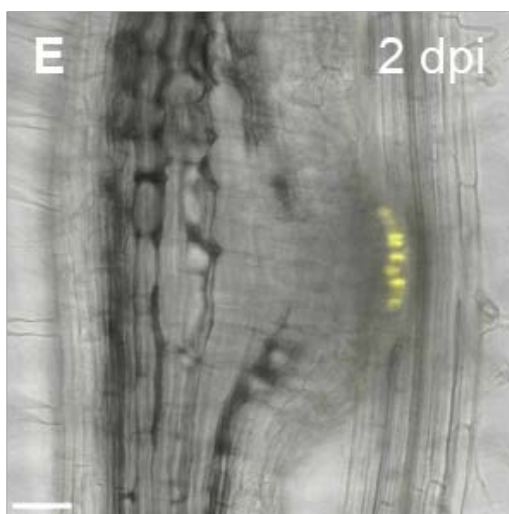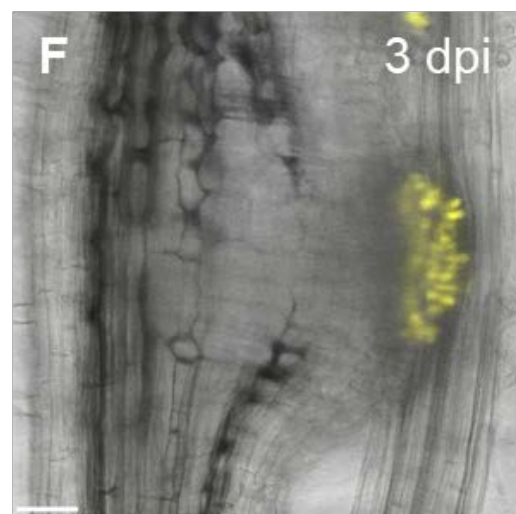

800 Figure 3

801

802

803

804

805

806

807

808

809

810

811

812

813

814

815

816

817

818

819

820

821

822

823

824

825

826

827

828

829

830

831

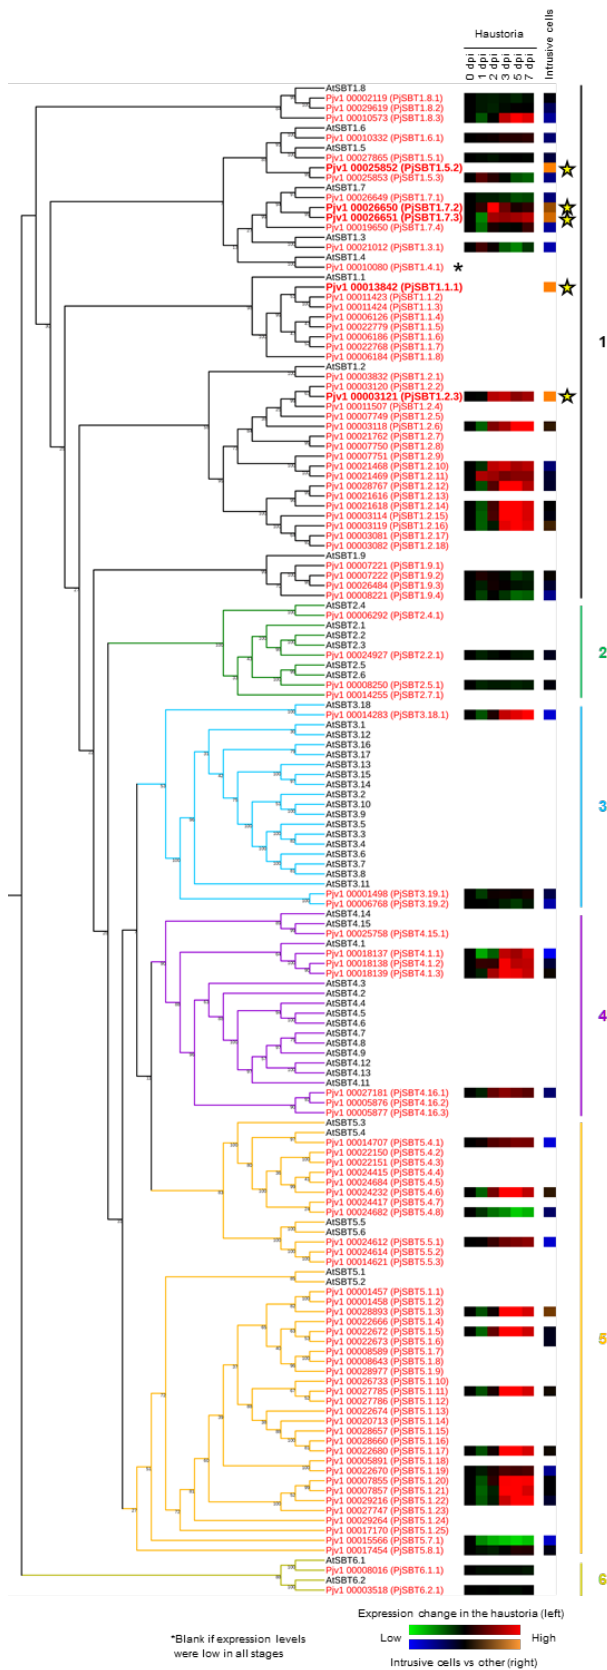

832 Figure 4

833

834

835

836

837

838

839

840

841

842

843

844

845

846

847

848

849

850

851

852

853

854

855

856

857

858

859

860

861

862

863

864

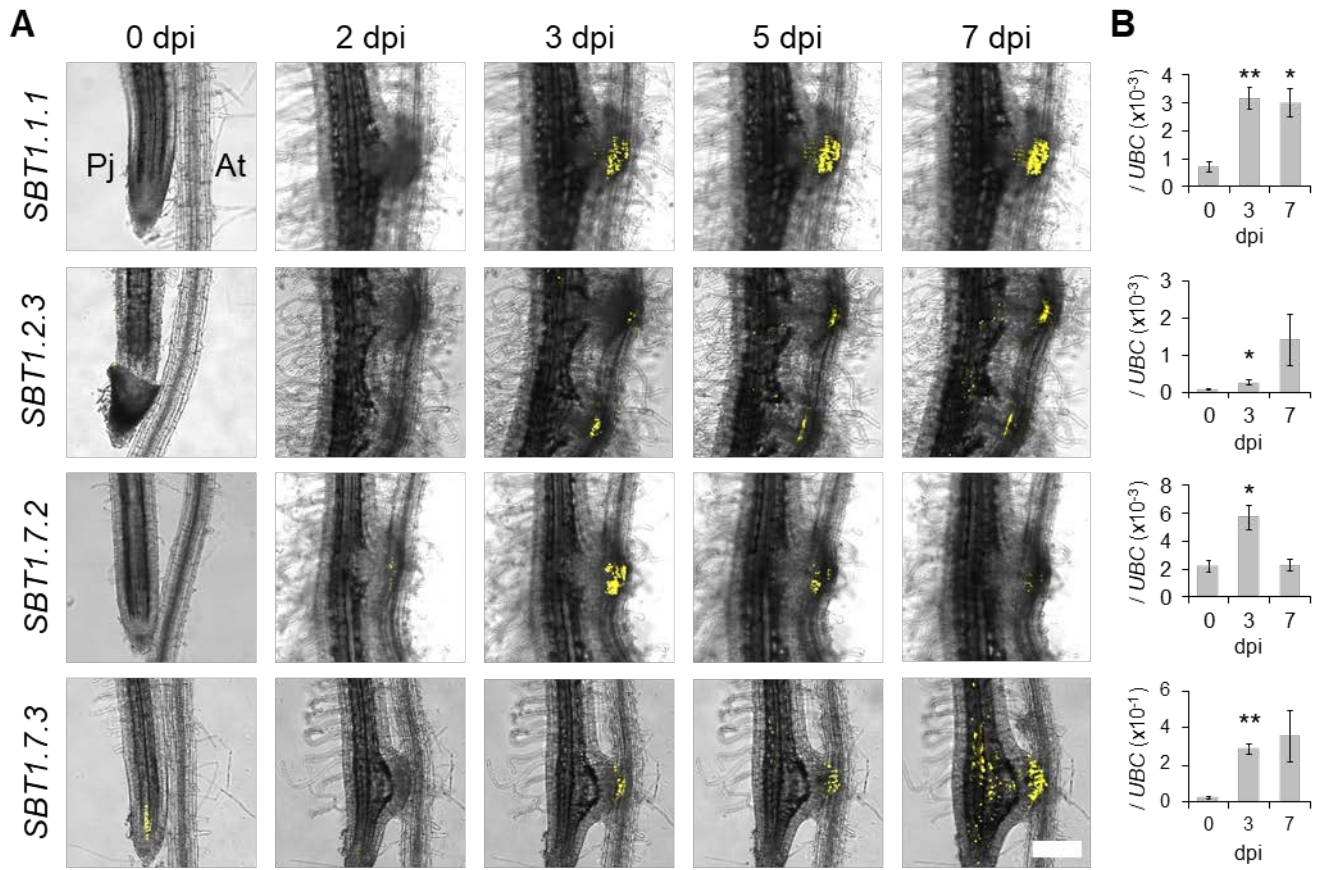



865 Figure 5

866  
867  
868  
869  
870  
871  
872  
873  
874  
875  
876  
877  
878  
879  
880  
881  
882  
883  
884  
885  
886  
887  
888  
889  
890  
891  
892  
893  
894  
895  
896  
897  
898

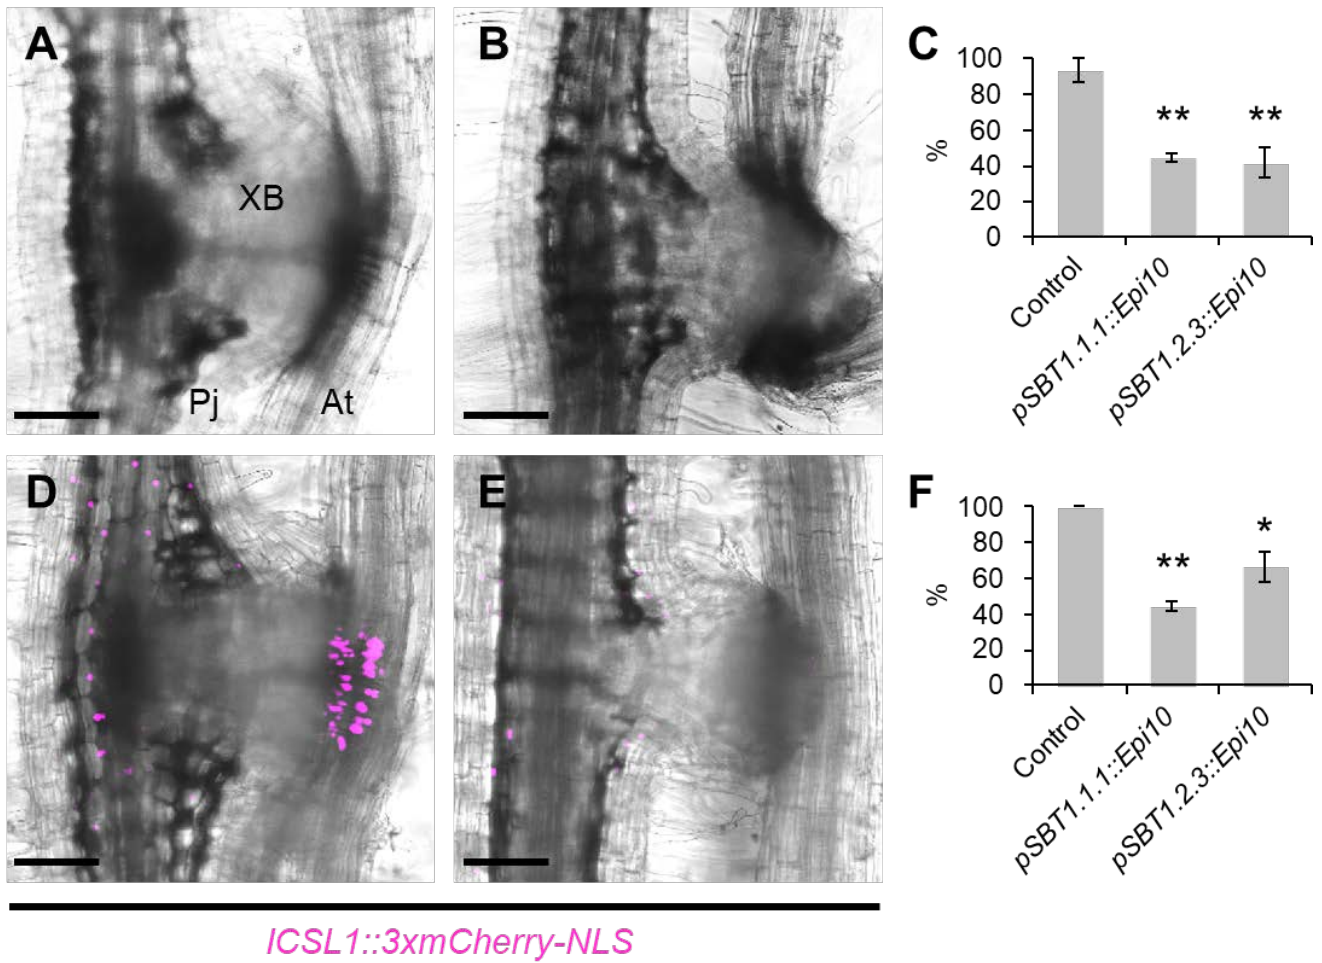

899 Figure 6

900  
901  
902  
903  
904  
905  
906  
907  
908  
909  
910  
911  
912  
913  
914  
915  
916  
917  
918  
919  
920  
921  
922  
923  
924  
925  
926  
927  
928  
929

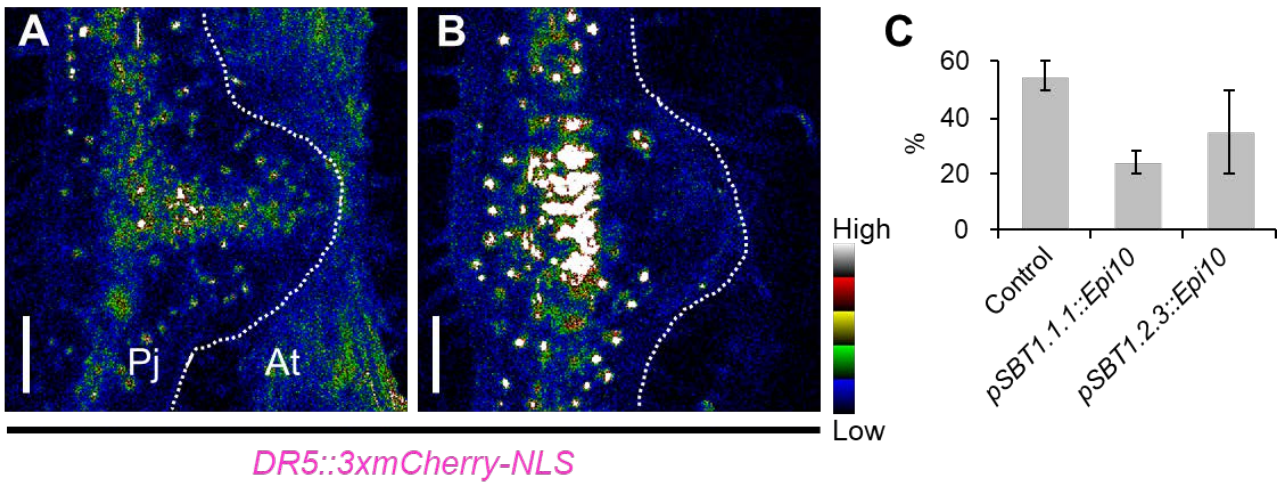

Source: https://www.biorxiv.org/content/10.1101/2020.03.30.015149v1.full.pdf
